# Supplementary material
Source: publisher figshare collection journal article supplement (https://acs.figshare.com/ndownloader/files/6455988)
Supplement: Supplementary file 1 [file 6455988]

# Supporting Information

## The Mechanism of Isobutanal-Isobutene Prins Condensation Reactions on Solid Brønsted Acids

Shuai Wang and Enrique Iglesia\*

*Department of Chemical and Biomolecular Engineering, University of California at  
Berkeley, Berkeley, CA 94720 USA*

\* Corresponding author: [iglesia@berkeley.edu](mailto:iglesia@berkeley.edu)

### S1. Number of protons and Lewis acid sites on aluminosilicate samples

Titration with 2,6-di-tert-butylpyridine (DTBP) during catalysis (described in Section 2.3 of the main text) were used to measure accessible proton sites on aluminosilicate samples (Table S1). The difference between the total amount of Al atoms ( $Al_{tot}$ , determined by elemental analysis) and the amount of Brønsted acid sites ( $H^+$ , determined by DTBP titrations) of each aluminosilicate sample was then used to estimate the content of Lewis acid sites ( $Al_{ex}$ ; Table S1).

**Table S1.** The number of protons and Lewis acid sites on the aluminosilicate samples used in this study.

|                    | H-CD-FAU          | H-Al-MCM-41       | H-ASA              |
|--------------------|-------------------|-------------------|--------------------|
| $H^+/Al_{tot}$     | 0.37 <sup>a</sup> | 0.35 <sup>b</sup> | 0.025 <sup>c</sup> |
| $Al_{ex}/Al_{tot}$ | 0.63              | 0.65              | 0.975              |

<sup>a</sup> adapted from ref [25]; <sup>b</sup> adapted from Figure 2b; <sup>c</sup> adapted from Figure S7a.

**S2.** A top view of the aluminosilicate slab model.

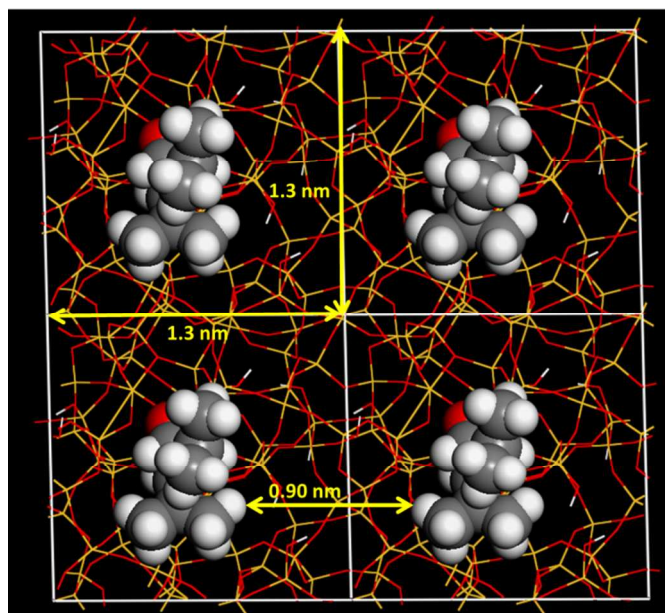

**Figure S1.** A top view of the isobutanol-isobutene Prins condensation C-C coupling transition state in an aluminosilicate unit cell ( $2 \times 2$  cells shown). The van der Waals radii for organic atoms are used to illustrate the occupied volume of the transition states.

**S3.** Structure of cluster models constructed from aluminosilicate slabs

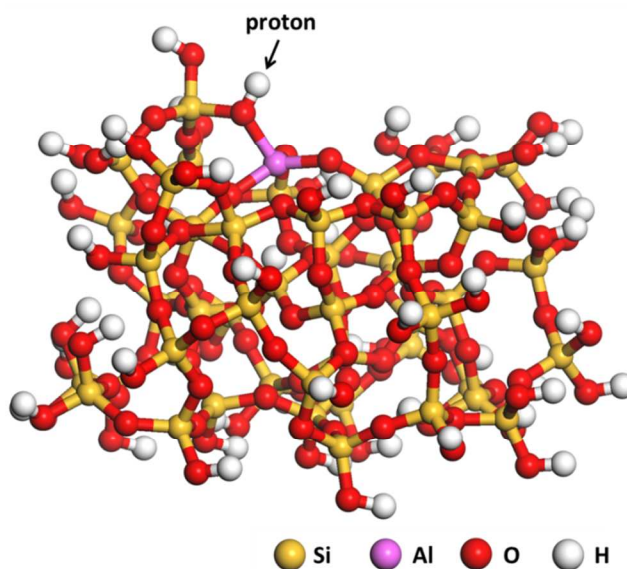

**Figure S2.** DFT-optimized structure of aluminosilicate cluster models ( $\text{Si}_{47}\text{AlO}_{122}\text{H}_{53}$ ) constructed from the aluminosilicate slabs ( $\text{Si}_{59}\text{AlO}_{124}\text{H}_9$ ; Section 2.4). The proton used for the calculation of deprotonation energy is indicated.

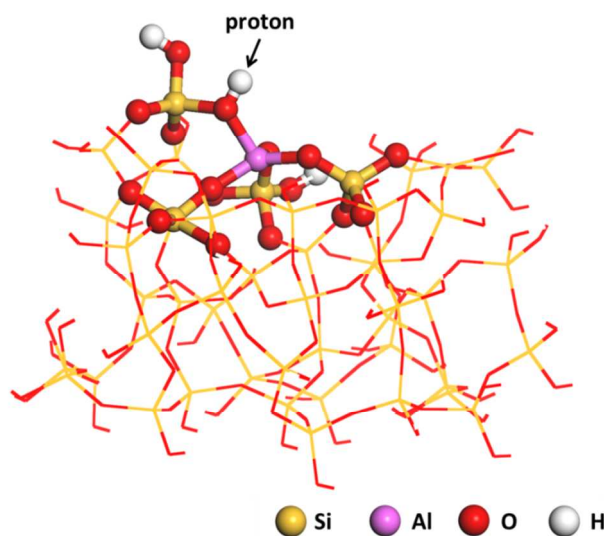

**Figure S3.**  $\text{H}^+[\text{Al}(\text{OSiO}_3\text{H})_2(\text{OSiO}_3)_2]^-$  structure of the  $\text{Si}_{47}\text{AlO}_{122}\text{H}_{53}$  cluster model (displayed in ball-and-stick modes; Fig. S1). All atoms in the  $\text{H}^+[\text{Al}(\text{OSiO}_3\text{H})_2(\text{OSiO}_3)_2]^-$  structure are allowed to relax during geometry and energy optimizations of the cluster and its conjugate anion, whereas the other atoms in the cluster are frozen instead.

**S4.** Independence of formation rate ratios of regioisomers for each diene/alkene product on space velocity (using 2,5-dimethyl-hexadienes (2,5-DMH) and 2,4,4-trimethyl-pentenes (2,4,4-TMP) as illustrative examples for diene and alkene products, respectively)

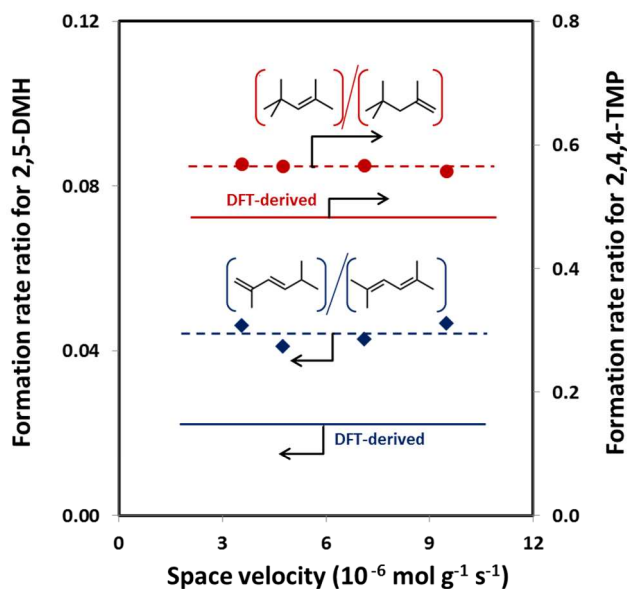

**Figure S4.** Formation rate ratios for trans-2,5-dimethyl-hexa-1,3-diene and 2,5-dimethyl-hexa-2,4-diene and for 2,4,4-trimethyl-pent-2-ene and 2,4,4-trimethyl-pent-1-ene as a function of space velocity (H-CD-FAU; 473 K; 1.0 kPa isobutanol; 0.5 kPa isobutene).

Dashed lines indicate linear trends. Solid lines represent DFT-derived rate ratios (G4MP2, 473 K, 1 bar).

**S5.** Conversion-selectivity relation for isobutanal-isobutene reactions on amorphous  $\text{SiO}_2\text{-Al}_2\text{O}_3$  (H-ASA)

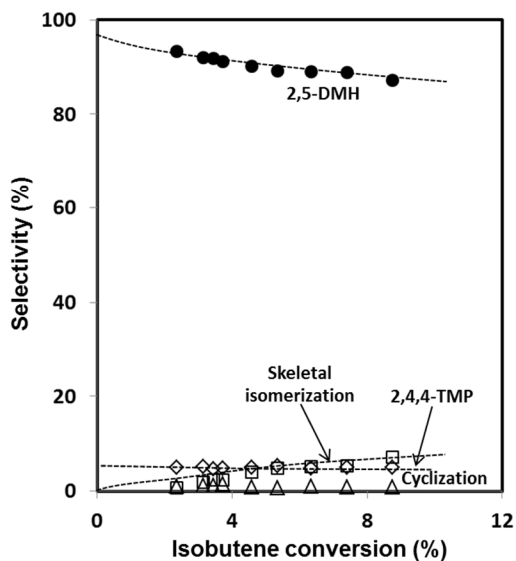

**Figure S5.** Selectivities of 2,5-DMH (●) and respective skeletal (□) and cyclized (Δ) isomers and 2,4,4-TMP (◇) as a function of isobutene conversion (H-ASA; 473 K; 2.0 kPa isobutanal; 1.0 kPa isobutene). Dashed curves indicate trends.

**S6.** Site titrations during isobutanal-isobutene reactions on H-ASA and  $\text{Nb}_2\text{O}_5 \cdot n\text{H}_2\text{O}$

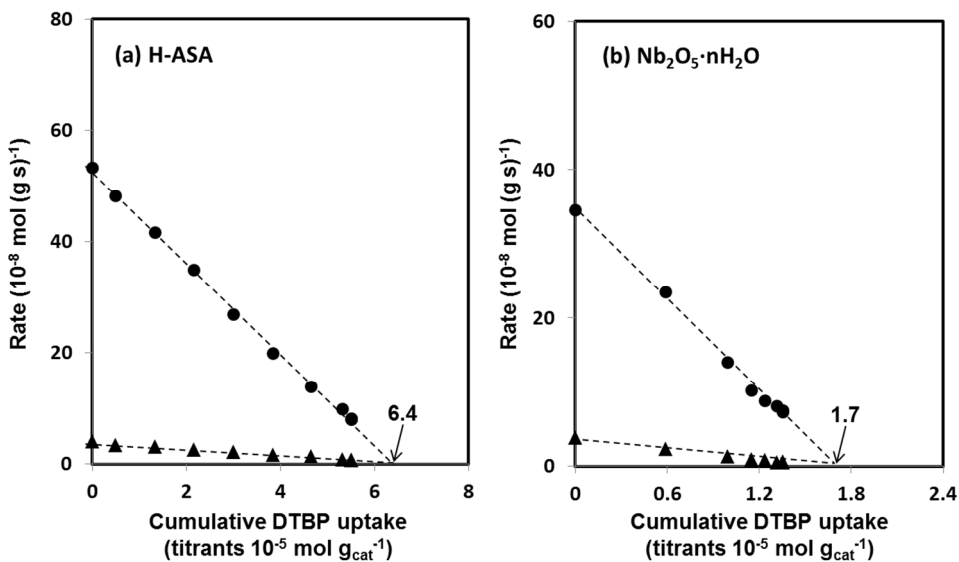

**Figure S6.** Isobutanal-isobutene Prins reaction ( $r_{\text{prins}}$ ) and isobutene oligomerization ( $r_{\text{oligo}}$ ) rates as a function of cumulative 2,6-di-tert-butylpyridine (DTBP) uptakes on (a)

H-ASA and (b)  $\text{Nb}_2\text{O}_5 \cdot n\text{H}_2\text{O}$  (473 K; 2.0 kPa isobutanol; 1.0 kPa isobutene; DTBP 2 Pa for H-ASA and 10 Pa for  $\text{Nb}_2\text{O}_5 \cdot n\text{H}_2\text{O}$ ). Dashed lines represent linear regression fits.

**S7. Deactivation of solid acids during Prins condensation and oligomerization reactions**

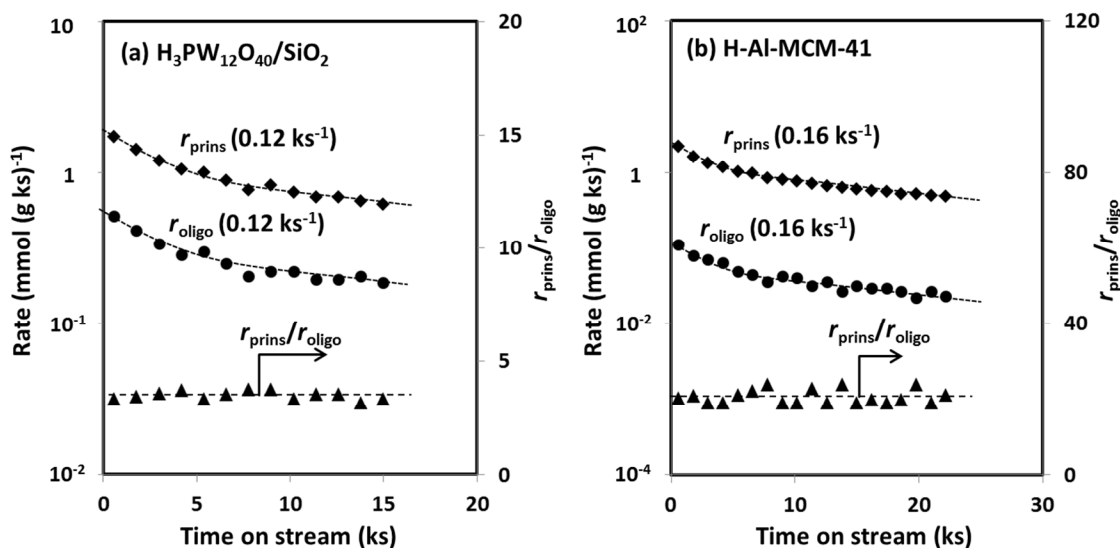

**Figure S7.** Semi-logarithmic plots of isobutanol-isobutene Prins condensation and isobutene oligomerization rates as a function of time-on-stream (a) on  $\text{H}_3\text{PW}_{12}\text{O}_{40}/\text{SiO}_2$  and (b) on H-Al-MCM-41 (473 K, 2.0 kPa isobutanol, 1.0 kPa isobutene). First-order deactivation constants are shown in parenthesis. Dashed curves indicate qualitative trends.

**S8. Parity plots for measured and predicted rates of isobutanol-isobutene reactants on solid acids**

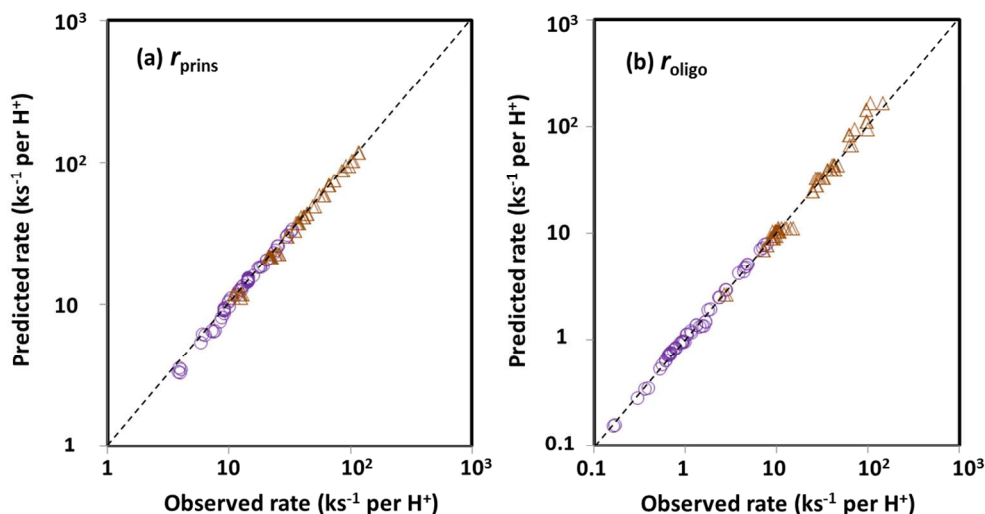

**Figure S8.** Parity plots for the measured and predicted rates of (a) isobutanol-isobutene Prins condensation (Eq. 2) and (b) isobutene oligomerization (Eq. 3) on H-Al-MCM-41

(○) and  $\text{H}_3\text{PW}_{12}\text{O}_{40}/\text{SiO}_2$  ( $\Delta$ ) with the regression-fitted parameters shown in Table 3 of the main text.

### S9. DFT estimates for stability of monomeric adsorbed species on POM clusters

**Table S2.** DFT-derived adsorption enthalpies ( $\Delta H_{\text{ads}}$ ) and adsorption free energies ( $\Delta G_{\text{ads}}$ ) for adsorbed species formed from isobutanol and isobutene on proton sites of POM clusters as illustrated in Scheme 8.<sup>a</sup>

|                                                    | POM cluster                              | Isobutanol-derived species |                        | Isobutene-derived species |              |               |
|----------------------------------------------------|------------------------------------------|----------------------------|------------------------|---------------------------|--------------|---------------|
|                                                    |                                          | H-bonded isobutanol        | 1-hydroxy-iso-butoxide | $\pi$ -complex            | iso-butoxide | tert-butoxide |
| $\Delta H_{\text{ads}}$<br>(kJ mol <sup>-1</sup> ) | $\text{H}_5\text{AlW}_{12}\text{O}_{40}$ | -78                        | -64                    | -60                       | -68          | -54           |
|                                                    | $\text{H}_4\text{SiW}_{12}\text{O}_{40}$ | -79                        | -68                    | -60                       | -64          | -49           |
|                                                    | $\text{H}_2\text{SW}_{12}\text{O}_{40}$  | -84                        | -66                    | -64                       | -61          | -44           |
| $\Delta G_{\text{ads}}$<br>(kJ mol <sup>-1</sup> ) | $\text{H}_5\text{AlW}_{12}\text{O}_{40}$ | -9                         | 28                     | 0                         | 10           | 32            |
|                                                    | $\text{H}_4\text{SiW}_{12}\text{O}_{40}$ | -12                        | 25                     | 1                         | 16           | 39            |
|                                                    | $\text{H}_2\text{SW}_{12}\text{O}_{40}$  | -13                        | 27                     | -3                        | 19           | 44            |

<sup>a</sup> PBE+D3BJ; 473 K, 1 bar; relative to a bare cluster and respective gaseous reactants.

**S10.** DFT-derived enthalpies for intermediates and transition states involved in Prins condensation and oligomerization pathways on aluminosilicates

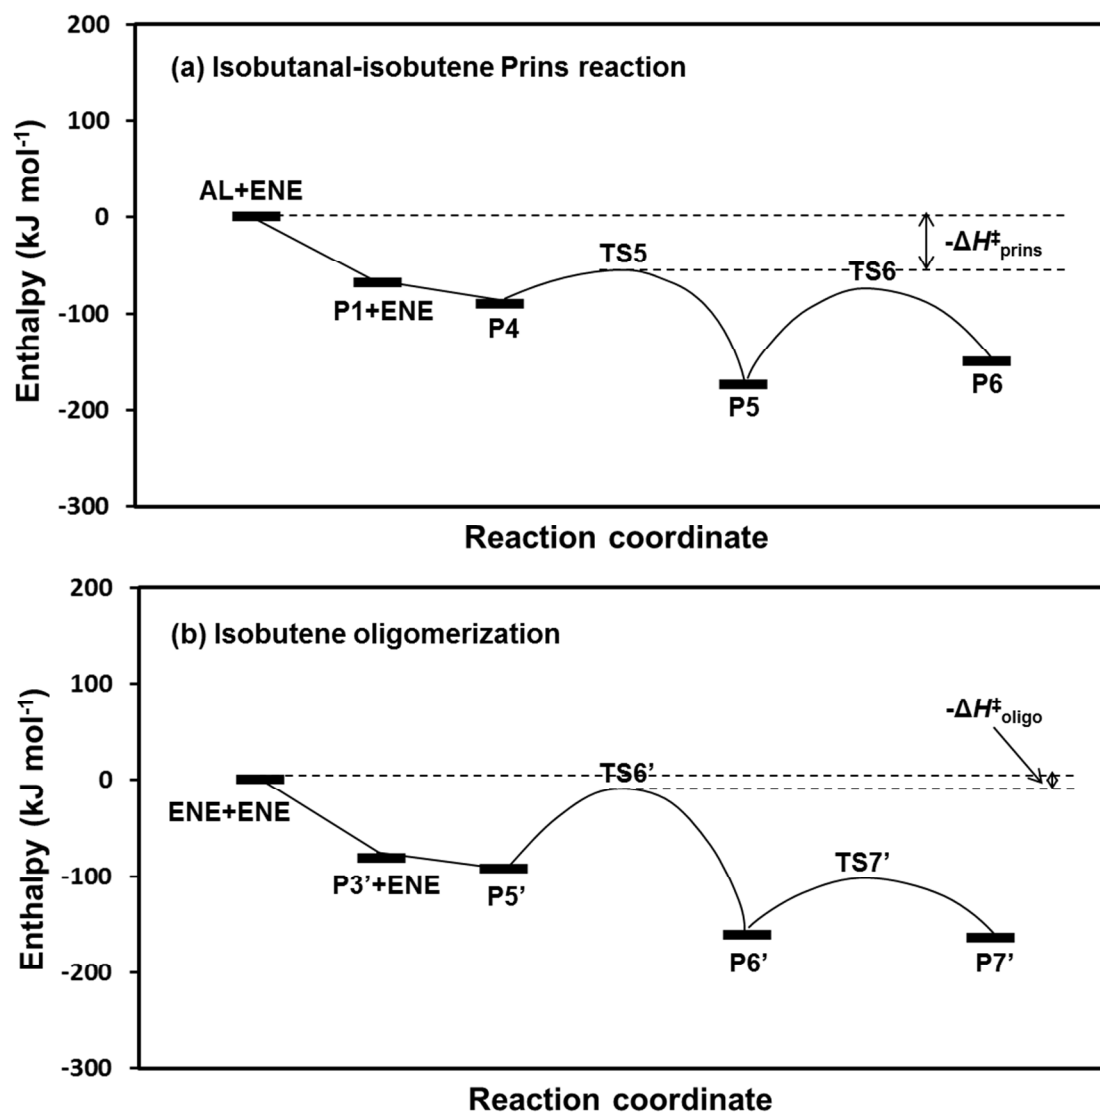

**Figure S9.** DFT-derived reaction enthalpy diagrams of (a) isobutanal-isobutene Prins condensation and (b) isobutene oligomerization pathways (aluminosilicate ( $\text{Si}_{59}\text{AlO}_{124}\text{H}_9$ ) slabs, PBE+D3BJ; 473 K, 1 bar). TSj and Pj represent respective transition state and product of Step j in Scheme 5; AL and ENE represent gaseous isobutanal and isobutene, respectively. Energies are relative to a bare surface and respective gaseous reactants.

**S11.** DFT-derived enthalpies and free energies for intermediates and transition states involved in Prins condensation and oligomerization pathways on POM clusters

**Table S3.** DFT-derived enthalpies ( $H$ ) and free energies ( $G$ ) for intermediates and transition states involved in isobutanal-isobutene Prins condensation elementary steps on POM clusters.<sup>a</sup>

|                                | POM cluster                                      | Prins condensation pathway <sup>b</sup> |     |      |     |      |
|--------------------------------|--------------------------------------------------|-----------------------------------------|-----|------|-----|------|
|                                |                                                  | P4                                      | TS5 | P5   | TS6 | P6   |
| $H$<br>(kJ mol <sup>-1</sup> ) | H <sub>5</sub> AlW <sub>12</sub> O <sub>40</sub> | -90                                     | -27 | -123 | -91 | -137 |
|                                | H <sub>4</sub> SiW <sub>12</sub> O <sub>40</sub> | -95                                     | -38 | -120 | -90 | -141 |
|                                | H <sub>3</sub> PW <sub>12</sub> O <sub>40</sub>  | -98                                     | -46 | -118 | -99 | -147 |
|                                | H <sub>2</sub> SW <sub>12</sub> O <sub>40</sub>  | -100                                    | -49 | -119 | -97 | -147 |
| $G$<br>(kJ mol <sup>-1</sup> ) | H <sub>5</sub> AlW <sub>12</sub> O <sub>40</sub> | 22                                      | 114 | 45   | 81  | 11   |
|                                | H <sub>4</sub> SiW <sub>12</sub> O <sub>40</sub> | 17                                      | 103 | 47   | 81  | 8    |
|                                | H <sub>3</sub> PW <sub>12</sub> O <sub>40</sub>  | 13                                      | 96  | 50   | 73  | 2    |
|                                | H <sub>2</sub> SW <sub>12</sub> O <sub>40</sub>  | 12                                      | 93  | 49   | 74  | 1    |

<sup>a</sup> PBE+D3BJ; 473 K, 1 bar; relative to a bare cluster, a gaseous isobutanal molecule and a gaseous isobutene molecule. <sup>b</sup> TSj and Pj represent respective transition state and product of Step j in Scheme 5a.

**Table S4.** DFT-derived enthalpies ( $H$ ) and free energies ( $G$ ) for intermediates and transition states involved in isobutene oligomerization elementary steps on POM clusters.<sup>a</sup>

|                                | POM cluster                                      | Oligomerization pathway <sup>b</sup> |      |      |      |     |
|--------------------------------|--------------------------------------------------|--------------------------------------|------|------|------|-----|
|                                |                                                  | P5'                                  | TS6' | P6'  | TS7' | P7' |
| $H$<br>(kJ mol <sup>-1</sup> ) | H <sub>5</sub> AlW <sub>12</sub> O <sub>40</sub> | -64                                  | -18  | -154 | -101 | -94 |
|                                | H <sub>4</sub> SiW <sub>12</sub> O <sub>40</sub> | -63                                  | -31  | -151 | -108 | -95 |
|                                | H <sub>3</sub> PW <sub>12</sub> O <sub>40</sub>  | -61                                  | -39  | -149 | -110 | -96 |
|                                | H <sub>2</sub> SW <sub>12</sub> O <sub>40</sub>  | -59                                  | -44  | -150 | -112 | -95 |
| $G$<br>(kJ mol <sup>-1</sup> ) | H <sub>5</sub> AlW <sub>12</sub> O <sub>40</sub> | 76                                   | 121  | 8    | 53   | 30  |
|                                | H <sub>4</sub> SiW <sub>12</sub> O <sub>40</sub> | 77                                   | 108  | 11   | 46   | 29  |
|                                | H <sub>3</sub> PW <sub>12</sub> O <sub>40</sub>  | 79                                   | 100  | 14   | 45   | 29  |
|                                | H <sub>2</sub> SW <sub>12</sub> O <sub>40</sub>  | 81                                   | 95   | 13   | 42   | 29  |

<sup>a</sup> PBE+D3BJ; 473 K, 1 bar; relative to a bare cluster, two gaseous isobutene molecules. <sup>b</sup> TSj and Pj represent respective transition state and product of Step j in Scheme 5b.



**S12.** DFT-derived entropy components in activation free energies for isobutanol-isobutene Prins condensation and isobutene oligomerization reactions on solid acids

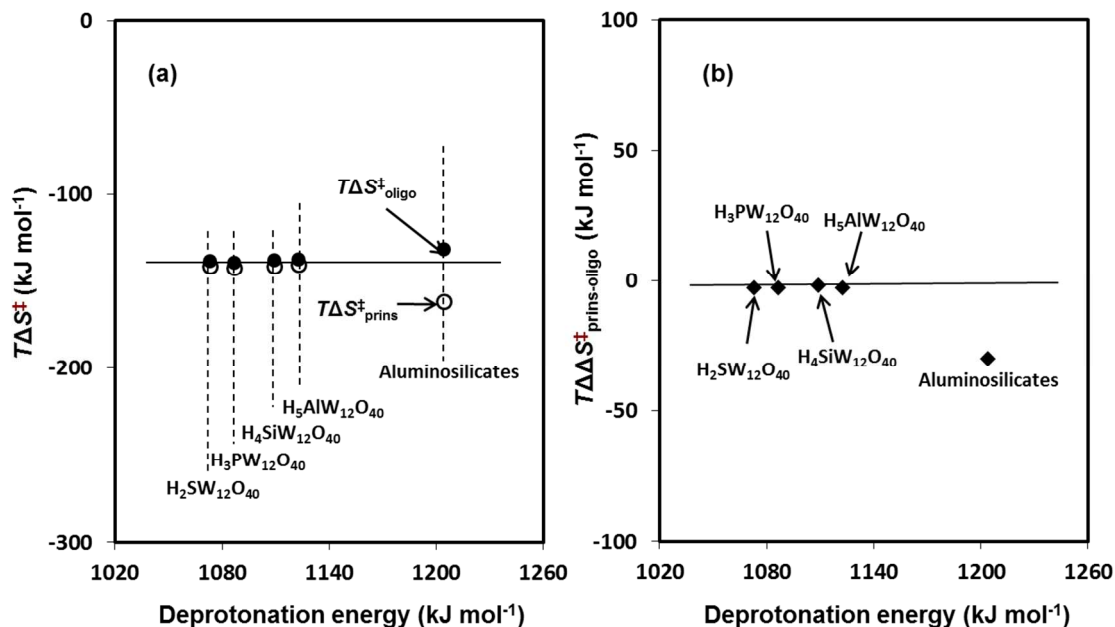

**Figure S10.** DFT-derived (a) entropy components in activation free energies for isobutanol-isobutene Prins condensation and isobutene oligomerization ( $T\Delta S^\ddagger_{\text{prins}}$  and  $T\Delta S^\ddagger_{\text{oligo}}$ ) and (b) their respective difference ( $T\Delta\Delta S^\ddagger_{\text{prins-oligo}}$ ) as a function of deprotonation energy of solid acids (PBE+D3BJ; referenced to a bare proton site and respective gaseous reactants; 473 K, 1 bar). Solid lines represent trends.
